# Supplementary material for: Construction of risk prediction model using m6A RNA methylation regulators in prostate cancer: comprehensive bioinformatic analysis and histological validation
Source: Research Square preprint supplement (doi:10.21203/rs.3.rs-979251/v1), 2021-10-19
Supplement: Supplementary file 1 [file a47e9bb59630fe8719988702.docx]

Supplementary Table 1. Oligonucleotide primers of relative genes.

| Gene | Forward | Reverse |
| --- | --- | --- |
| HNRNPA2B1 | CAGCGGCAGTTCTCACTACA | ATCCCTCATTACCACACAGTCT |
| IGFBP3 | GTCCAAGCGGGAGACAGAATAT | CCTGGGACTCAGCACATTGA |
| MMAB | AAACGGGAGACAAAGGGTTT | TGCAATGTGCACTGGATTTT |
| 18S | AAACGGCTACCACATCCA | CACCAGACTTGCCCCTCCA |
| GAPDH | TGACTTCAACAGCGACACCCA | CACCCTGTTGCTGTAGCCAAA |
